# Supplementary material
Source: Springer Nature journal article supplement (https://www.springermedizin.de/resource/supplementary/12970_2007_40_MOESM7_ESM.pdf/9594286)
Supplement: MOESM7 [file 9594286]

## Muscle Soreness Index

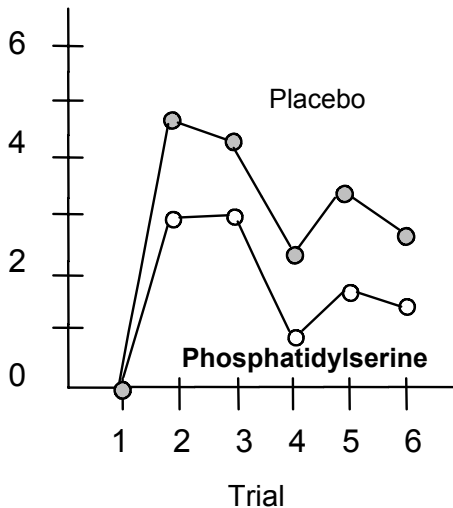

### Muscle Soreness Index

10: Extremely sore; severely debilitated

8: Very sore, interferes with daily activities

6: Sore; very uncomfortable

4: Sore; but doesn't interfere with activities

2: Minor soreness

0: No soreness
